# Supplementary material
Source: MDPI journal article supplement (https://www.mdpi.com/2297-8739/3/1/7)
Supplement: s1 [file s1]

Supplementary Information

**Figure S1.** Chromatograms obtained for a standard solution containing AMP, MET and EPE
(8.0 µg/mL, each) using a percentage of acetonitrile in the mobile phase of: (**a**) 50 % and (**b**) 70 %, using an unmodified TRB-35 extractive capillary (30 cm length) for IT-SPME. For other experimental details, see text.

**Figure S2.** Chromatograms obtained for a standard solution containing AMP, MET and EPE
(8.0 µg/mL, each) with TRB-35 extractive capillaries of different length. For other experimental details, see text.

**Figure S3.** (**a**)Chromatograms obtained for the reaction mixture (250 µL of buffer and 250 µL of
0.1 mM FMOC), (**b**) the same reaction mixture after the introduction of a cotton swab for 5.0 min, and (**c**) after the introduction of a cotton swab impregnated with 125 µL of a standard solution of EPE
(2.0 µg/mL). For IT-SPME a c-MWCNTs functionalized TRB-35 capillary (40 cm length) was used. For other experimental details, see text.

**Table S1.** Response *vs.* concentration linearity data.

| **Capillary** | **Concentration Interval (µg/mL)** | **Linearity (*y* = *ax* + *b*)** | | |
| --- | --- | --- | --- | --- |
| **EPE** | **AMP** | **MET** |
| TRB-35 c-MWCNTs *L*= 40 cm | 2.0–10.0 | *a* = (39 ± 3) × 104  *b* = (−5 ± 2) × 106  *R*2 = 0.980 | *a* = (606 ± 14) × 103  *b* = (3 ± 9) × 105  *R*2 = 0.998 | *a* = (159 ± 5) × 104  *b* = (−8 ± 3) × 106  *R*2 = 0.997 |
| TRB-5 c-SWCNTs *L*= 36 cm | 2.0–10.0 | *a* = (23 ± 7) × 104  *b* = (2 ± 5) × 106  *R*2 = 0.764 | *a* = (22 ± 9) × 104  *b* = (2 ± 6) × 106  *R*2 = 0.658 | *a* = (64 ± 8) × 104  *b* = (21 ± 14) × 105  *R*2 = 0.962 |
| 2.0–8.0 | *a* = (35 ± 4) × 104  *b* = (−27 ± 15) × 104  *R*2 = 0.987 | *a* = (36 ± 8) × 104  *b* = (9 ± 4) × 105  *R*2 = 0.910 | *a* = (97 ± 14) × 104  *b* = (11 ± 8) × 105  *R*2 = 0.96 |
| TRB-35 *L*= 30 cm | 2.0–10.0 | *a* = (117 ± 4) × 103  *b* = (−3 ± 3) × 105  *R*2 = 0.997 | *a* = (28 ± 2) × 104  *b* = (11 ± 13) × 104  *R*2 = 0.990 | *a* = (70 ± 5) × 104  *b* = (6 ± 3) × 106  *R*2 = 0.983 |
| TRB-5 *L*= 30 cm | 2.0–10.0 | *a* = (61 ± 17) × 103  *b* = (17 ± 11) × 105  *R*2 = 0.810 | *a* = (10 ± 3) × 104  *b* = (2 ± 2) × 106  *R*2 = 0.750 | *a* = (33 ± 9) × 104  *b* = (1 ± 6) × 105  *R*2 = 0.800 |
| 2.0–8.0 | *a* = (8 ± 2) × 104  *b* = (8 ± 1) × 105  *R*2 = 0.910 | *a* = (15 ± 2) × 104  *b* = (3 ± 10) × 104  *R*2 = 0.972 | *a* = (49 ± 2) × 104  *b* = (−52 ± 10) × 104  *R*2 = 0.997 |
